# Supplementary material for: Achieving high selectivity for nitrate electrochemical reduction to ammonia over MOF-supported RuxOy clusters
Source: Royal Society of Chemistry journal article supplement (doi:10.1039/d1ta09441f), 2022-01-01
Supplement: d1ta09441f1.pdf [file d1ta09441f1.pdf]

## Supporting Information

### Achieving a High Selectivity for Nitrate Electrochemical Reduction to Ammonia over MOF-Supported $\text{Ru}_x\text{O}_y$ Clusters

Jiangzhou Qin,<sup>a</sup> Kun Wu,<sup>a</sup> Liuzhou Chen,<sup>a</sup> Xintao Wang,<sup>a</sup> Quanlin Zhao,<sup>a</sup> Baojun Liu<sup>\*b</sup>  
and Zhengfang Ye<sup>\*a</sup>

*a. Department of Environmental Engineering, Peking University, The Key Laboratory of Water and Sediment Sciences, Ministry of Education, Beijing, 100871, China.*

*E-mail: [zhengfangye@163.com](mailto:zhengfangye@163.com)*

*b. College of Resource and Environmental Engineering, Guizhou University, Guizhou Karst Environmental Ecosystems Observation and Research Station, Key Laboratory of Karst Georesources and Environment, Ministry of Education, Guiyang, 550025, China.*

*E-mail: [jbliu@gzu.edu.cn](mailto:jbliu@gzu.edu.cn)*

## ***1. Material Characterization:***

The morphology of various electrodes was observed by field-emission scanning electron microscopy (FESEM, ZEISS Merlin, SIGMA+X-Max20) at an acceleration voltage of 10.0 kV and transmission electron microscopy (TEM, JEM-2100F electron microscope, JEOL, Japan) at an acceleration voltage of 200 kV. X-ray diffraction (XRD, Empyrean, Netherlands) was measured with a power X-ray diffractometer (Smartlab 9, Rigaku). X-ray photoelectron spectra (XPS) were collected by a Thermo ESCALAB 250xi X-ray photoelectron spectrometer with Al K $\alpha$  X-ray (1486.6 eV), as the excitation source. <sup>1</sup>H NMR (Bruker, AVANCE III, 600 MHz) spectra were obtained using <sup>15</sup>NO<sub>3</sub><sup>-</sup>. The X-ray absorption near edge structures (XANES) and Extended x-ray absorption fine structure (EXAFS) were performed at the Super Photon ring-8 (SPring-8) of Harima Science Garden City, Hyogo in Japan. Ring: 8.0 GeV (996 mA-99.5 mA).

## ***2. Product Quantification:***

The UV-Vis spectrophotometer was used to detect the ion concentration of pre- and post-test electrolytes after dilution to appropriate concentration to match the range of calibration curves. The specific detection methods are as follow:

### ***2.1 The detection of NH<sub>4</sub><sup>+</sup>-N yields:***

The NH<sub>4</sub><sup>+</sup>-N yields were determined by a colorimetric method using the Nessler reagent, as reported elsewhere.

Preparation of Nessler's reagent: First, 16.0 g of sodium hydroxide (NaOH) was dissolved in 50 mL ultrapure water. Then, 7.0 g of potassium iodide (KI) and 10.0 g of

mercury iodide ( $\text{HgI}_2$ ) were also dissolved in 20 mL ultrapure water. The above solution was gradually added to the 50 mL sodium hydroxide solution under strong agitation. Finally, the mixture was diluted to 100 mL with ultrapure water.

The preparation of sodium potassium tartrate solution ( $\rho = 500 \text{ g}\cdot\text{L}^{-1}$ ): First, 50.0 g of sodium potassium tartrate ( $\text{KNaC}_4\text{H}_6\text{O}_6\cdot 4\text{H}_2\text{O}$ ) was dissolved in 100 mL ultrapure water, and then boiled to remove the residual ammonium. Finally, the solution was diluted to 100 mL after cooling down to ambient temperature.

In details, 1.0 mL electrolyte was taken out from the electrolytic cell and diluted to 10 mL up to the detection range. 0.2 mL of sodium potassium tartrate solution and 0.2 mL of Nessler's reagent were added onto the above solution. After shaking and standing for 20 minutes, the absorbance was tested by UV-Vis spectrophotometry at a wavelength of 420 nm. The concentration-absorbance curve was calibrated by using standard  $\text{NH}_4\text{Cl}$  solutions at a series of concentrations, and the fitting curve is  $y = 0.1645x + 0.0075$  ( $R^2 = 0.995$ )

## ***2.2 The detection of $\text{NO}_3^-$ -N yields:***

Firstly, 0.2 mL electrolyte was taken out from the electrolytic cell and diluted to 10 mL to detection range. Then, 0.2 mL 1 M HCl and 0.06 mL 0.8 wt % sulfamic acid solution were added into the aforementioned solution. After 15 minutes, the absorbance was detected by UV-Vis spectrophotometry at a wavelength of 220 nm and 275 nm. The final absorbance of  $\text{NO}_3^-$ -N was calculated based on the following equation:  $A = A_{220\text{nm}} - 2A_{275\text{nm}}$ . The calibration curve can be obtained through different concentrations of

NaNO<sub>3</sub> solutions and the corresponding absorbance ( $y = 0.2256x + 0.0009$ ,  $R^2 = 0.9998$ ).

### ***2.3 The detection of NO<sub>2</sub><sup>-</sup>-N yields:***

The color developer was configured as follows: 20 g of p-aminobenzenesulfonamide was added to a mixed solution (250 mL water and 50 mL phosphoric acid), and then 1 g of N-(1-naphthyl)-ethylenediamine dihydrochloride was dissolved in the above solution. Finally, the above solution was transferred to a 500 mL volumetric flask and diluted to the mark.

Specifically, 0.2 mL electrolyte was taken out from the electrolytic cell and diluted to 10 mL to detection range. Next, 0.1 mL color reagent was added into the aforementioned 10 mL solution. After shaking and standing for 20 minutes, the absorbance was subjected to UV-Vis spectrophotometry at a wavelength of 540 nm. The calibration curve can be obtained through different concentrations of NaNO<sub>2</sub> solutions and the corresponding absorbance ( $y = 3.2238x - 0.006$ ,  $R^2 = 0.9994$ ).

### ***3. Calculation of the yield, selectivity, and Faradaic efficiency.***

The concentrations of NH<sub>4</sub><sup>+</sup>-N was calculated based on the following equation:

$$\text{NH}_4^+\text{-N yield rate} = [c(\text{NH}_4^+\text{-N}) \times V] / (t \times m_{cat.})$$

The selectivity of NH<sub>4</sub><sup>+</sup> in the product was calculated based on the following equation:

$$\text{NH}_4^+\text{ selectivity} = c(\text{NH}_4^+\text{-N}) / c(\text{NO}_3^+\text{-N}) \times 100\%$$

The Faradaic efficiency of NH<sub>4</sub><sup>+</sup> was calculated based on the following equation:

$$\text{Faradaic efficiency} = [8F \times c(\text{NH}_4^+\text{-N}) \times V] / [M(\text{NH}_4^+\text{-N}) \times Q]$$

where  $c(\text{NH}_4^+\text{-N})$  was the ammonia concentration,  $V$  was the electrolyte volume (120

mL),  $t$  was the reaction time (1 h), and  $m_{cat.}$  was the mass of the electrocatalyst pipetted onto the carbon paper,  $F$  was the Faradaic constant (96485 C mol<sup>-1</sup>),  $Q$  was the total charge passing the electrode.

#### ***4. Isotope Labeling Experiments:***

Na<sup>15</sup>NO<sub>3</sub> (isotopic abundance: 99 atom%, chemical purity ≥ 98.5%) was used as the feeding N-source to perform the isotopic labeling nitrate reduction experiments to clarify the source of ammonia. After electro-reduction reaction, electrolyte with obtained <sup>15</sup>NH<sub>4</sub><sup>+</sup>-<sup>15</sup>N was taken out and the pH value was adjusted to 2 using 1 M HCl. To further quantifying the concentration of NH<sub>4</sub><sup>+</sup>, a series of <sup>15</sup>NH<sub>4</sub><sup>+</sup>-<sup>15</sup>N solutions (<sup>15</sup>NH<sub>4</sub>Cl) with known concentration (5, 10, 15, 30, 50 mg/L <sup>15</sup>NH<sub>4</sub><sup>+</sup>-<sup>15</sup>N) were prepared to create the calibration curve. Then, 0.9 mL of the resultant solution was thoroughly mixed with 0.1 mL D<sub>2</sub>O for the <sup>1</sup>H nuclear magnetic resonance (NMR) measurement on a Bruker Avance III 600 NMR spectrometer. Similarly, <sup>14</sup>NH<sub>4</sub><sup>+</sup> experiment was also operated in the same way. The calibration curve was obtained through different concentrations of <sup>15</sup>NH<sub>4</sub>Cl solutions and the corresponding absorbance ( $y = 51.155x + 262.58$ ,  $R^2 = 0.9991$ )

#### ***5. FTIR characterization:***

In situ FTIR was performed on an IRTracer-100 spectrometer. The electrochemical test was conducted in a custom-made three-electrode electrochemical single cell. A Pt plate and a saturated Ag/AgCl were used as the counter and reference electrodes, respectively. The catalyst electrode was tightly pressed against the window. Firstly, the background value was collected in the presence of RuNi-MOF, H<sub>2</sub>O, NaSO<sub>4</sub> and

NaNO<sub>3</sub>. The FTIR spectra were recorded by varying with time during chronoamperometry at -1.6 V vs Ag/AgCl. Finally, the spectra were obtained by subtracting the background from the spectra of samples.

### **6. Theoretical calculations:**

The free energy profiles of NO<sub>3</sub><sup>-</sup> to NH<sub>3</sub> on Ru nanoparticle were investigated by the Vienna Ab-initio Simulation Package (VASP) with the revised Perdew-Burke-Ernzerh functional of (RPBE) of the generalized gradient approximation (GGA). The interaction between ionic core and valence electrons was calculated by the PAW pseudo-potential. The Ru nanoparticle was simulated by 66 Ru atoms. In the geometry optimization, the energy cutoff of plane-wave basis of 400 eV and energy convergence threshold of  $1.0 \times 10^{-5}$  eV were used. After geometry optimization, the charge density difference mappings between NH<sub>3</sub> and Ru sites were calculated with the Monkhorst-Pack k-point mesh of  $2 \times 2 \times 1$ . The wider points grid, larger energy cutoff, and higher energy convergence threshold had been examined, which showed the little influence on the electronic calculations. The reported standard hydrogen electrode (SHE) model was used in the calculations of Gibbs free energy changes ( $\Delta G$ ) of all reaction steps. The chemical potential of a proton-electron pair,  $\mu(\text{H}^+) + \mu(\text{e}^-)$ , is equal to the half of the chemical potential of one gaseous hydrogen,  $1/2\mu(\text{H}_2)$ , at  $U = 0$  V vs SHE at pH = 0. The G was calculated by the following formula:

$$G = E + H(T) - TS$$

where E, H(T) and S are the electronic free energy, enthalpy and entropy of model at  $T = 298.15$  K, respectively.

The highest reaction energy of elemental steps was used as the energy barrier in each pathway. Considering the charge balance of model, in the adsorption of  $\text{NO}_3^-$ , one proton was simultaneously adsorbed, which was equal to the adsorption of one  $\text{HNO}_3$ . Besides, in the reduction of  $\text{NO}_3^-$ , one proton would also directly bind with the adsorbed  $\text{NO}_3^-$  and reduce it into one adsorbed  $\text{HNO}_3$  according to SHE models. Actually, the present adsorption step of  $\text{HNO}_3$  consists of one  $\text{NO}_3^-$ -adsorption step and one reduction step, which can simultaneously maintain the charge balance and the following reduction step.

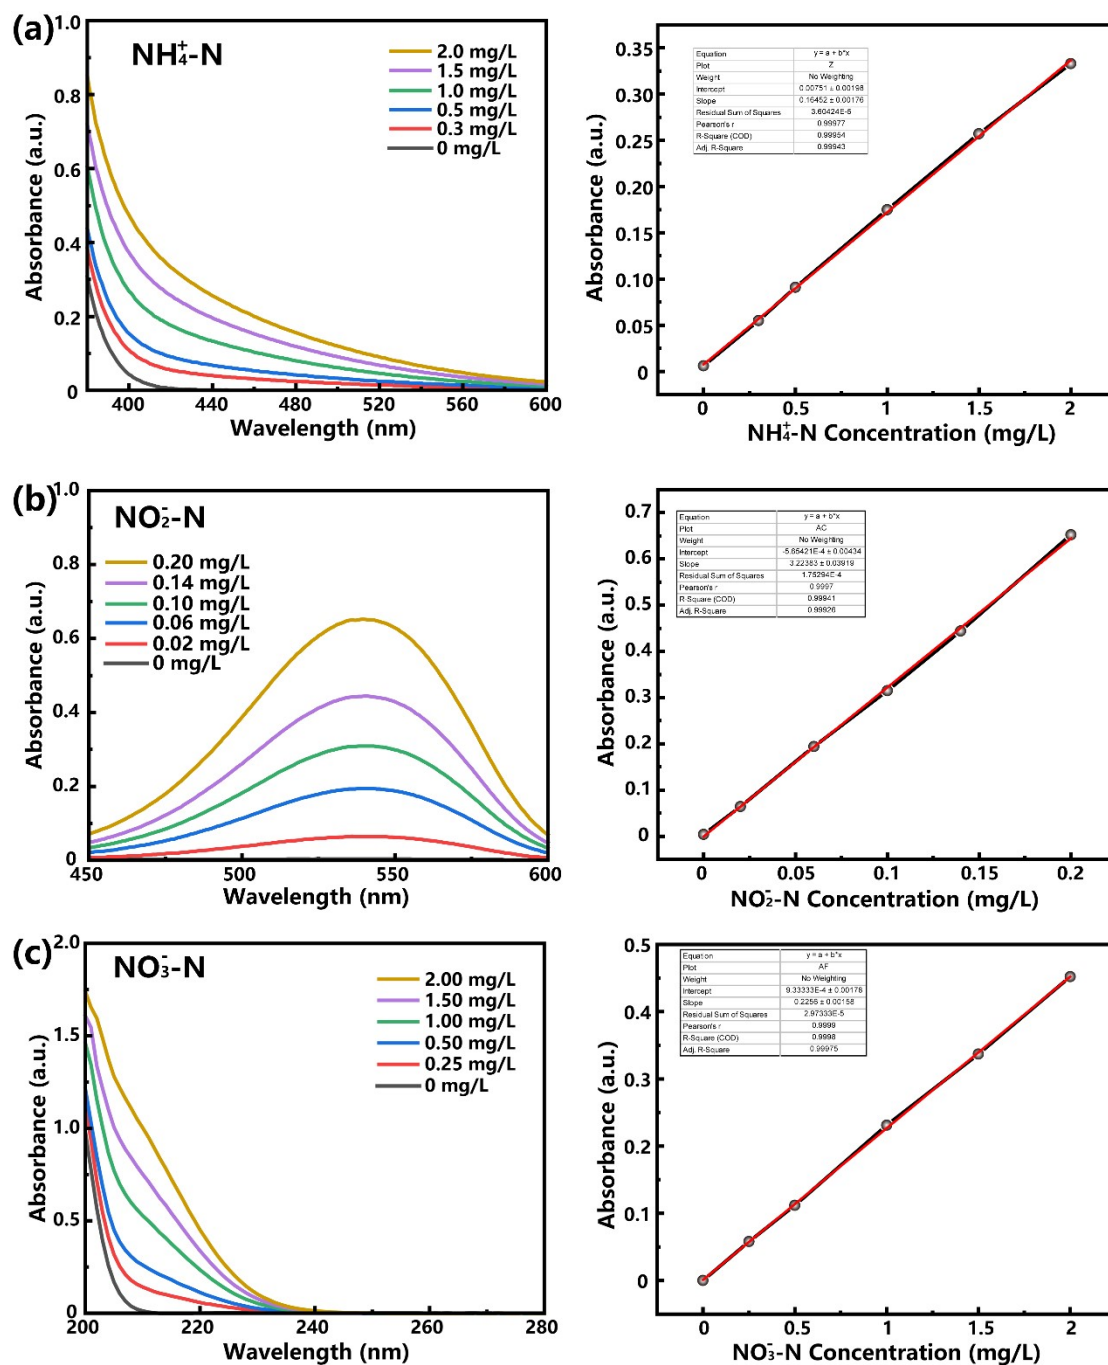

**Figure S1.** The UV-Vis absorption spectra in different concentration of (a)  $\text{NH}_4^+$ , (b)  $\text{NO}_2^-$ , (c)  $\text{NO}_3^-$  and the corresponding standard curve.



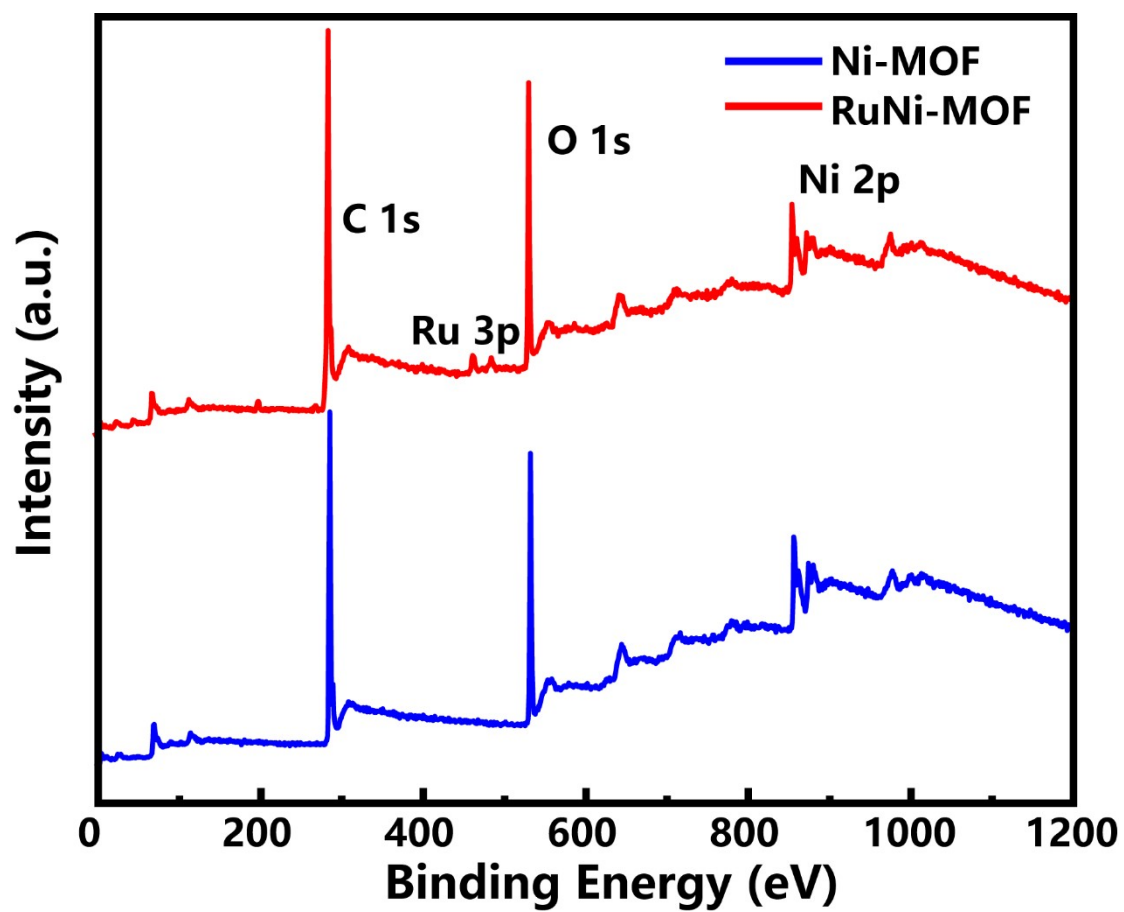

Figure S2. XPS pattern of Ni-MOF and RuNi-MOF.

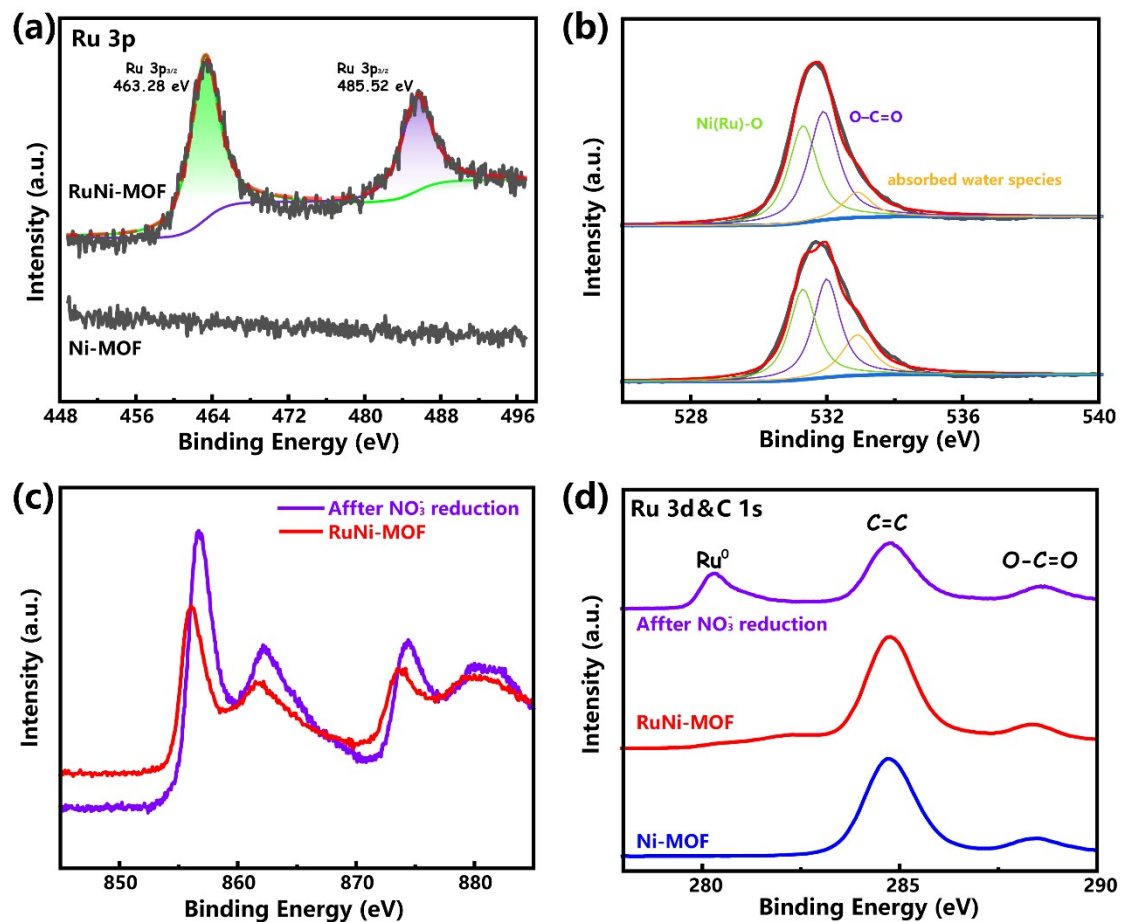

**Figure S3.** (a-b) Ru 3p and O 1s spectra of RuNi-MOF. (c-d) XPS spectra of Ni 2p and Ru 3d for RuNi-MOF catalysts before and after NO<sub>3</sub><sup>-</sup> activation.

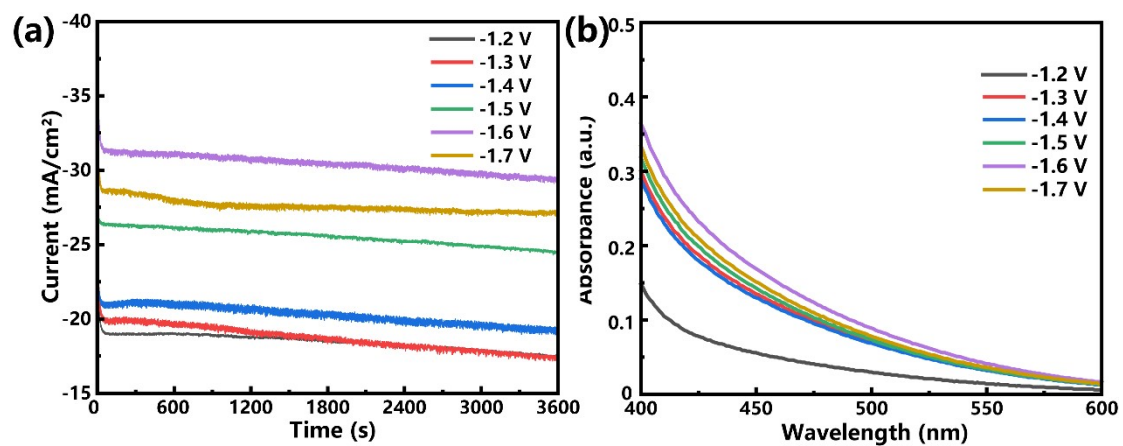

**Figure S4.** Chronoamperometric curves (a) and UV-vis absorption spectra (b) of the RuNi-MOF at various potentials in 50 mg/L NO<sub>3</sub><sup>-</sup>-N and 0.1 M NaSO<sub>4</sub> electrolytes.

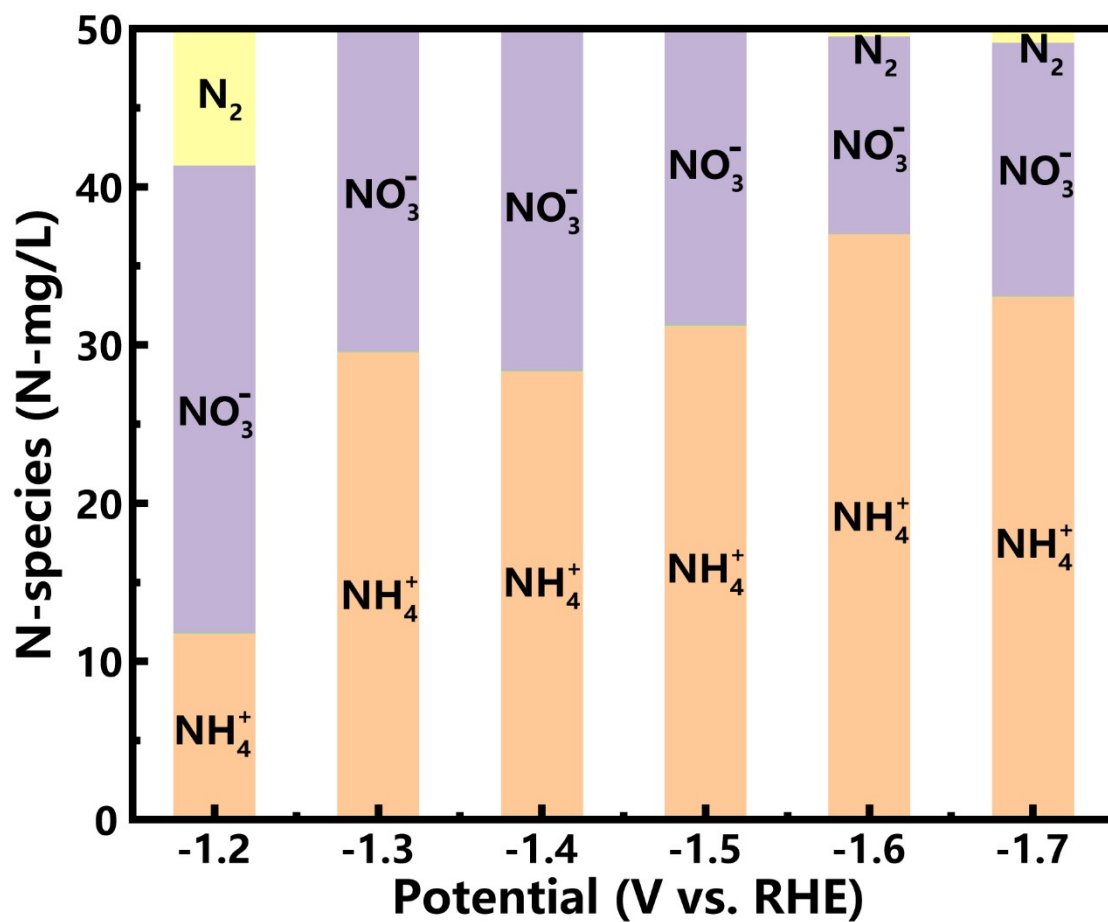

**Figure S5.** The mass balance of N-species at various potentials in 50 mg/L  $\text{NO}_3^-$ -N and 0.1 M  $\text{NaSO}_4$  electrolytes over the RuNi-MOF.

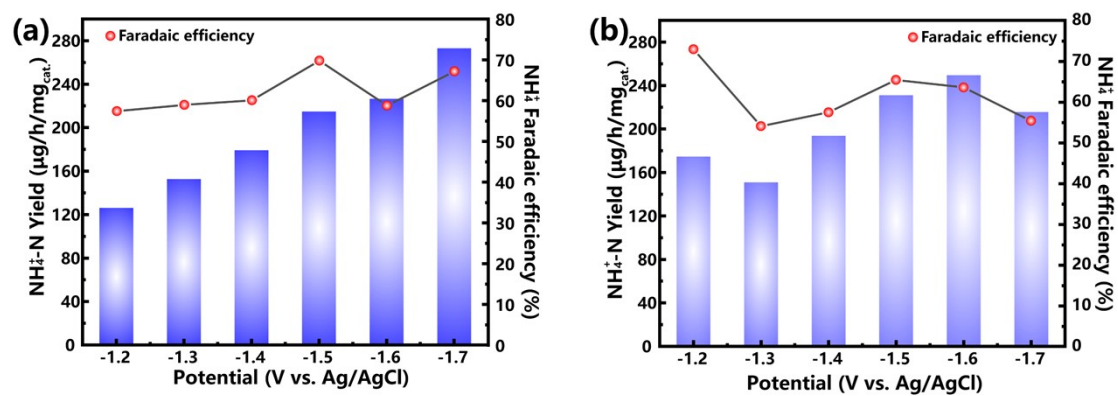

**Figure S6.** Potential-dependent NH<sub>4</sub><sup>+</sup> yield and Faradaic efficiency over RuNi-MOF at various potentials in 0.1 M NaSO<sub>4</sub> electrolytes containing 100 mg/L (a) or 200 mg/L (b) NO<sub>3</sub><sup>-</sup>-N.

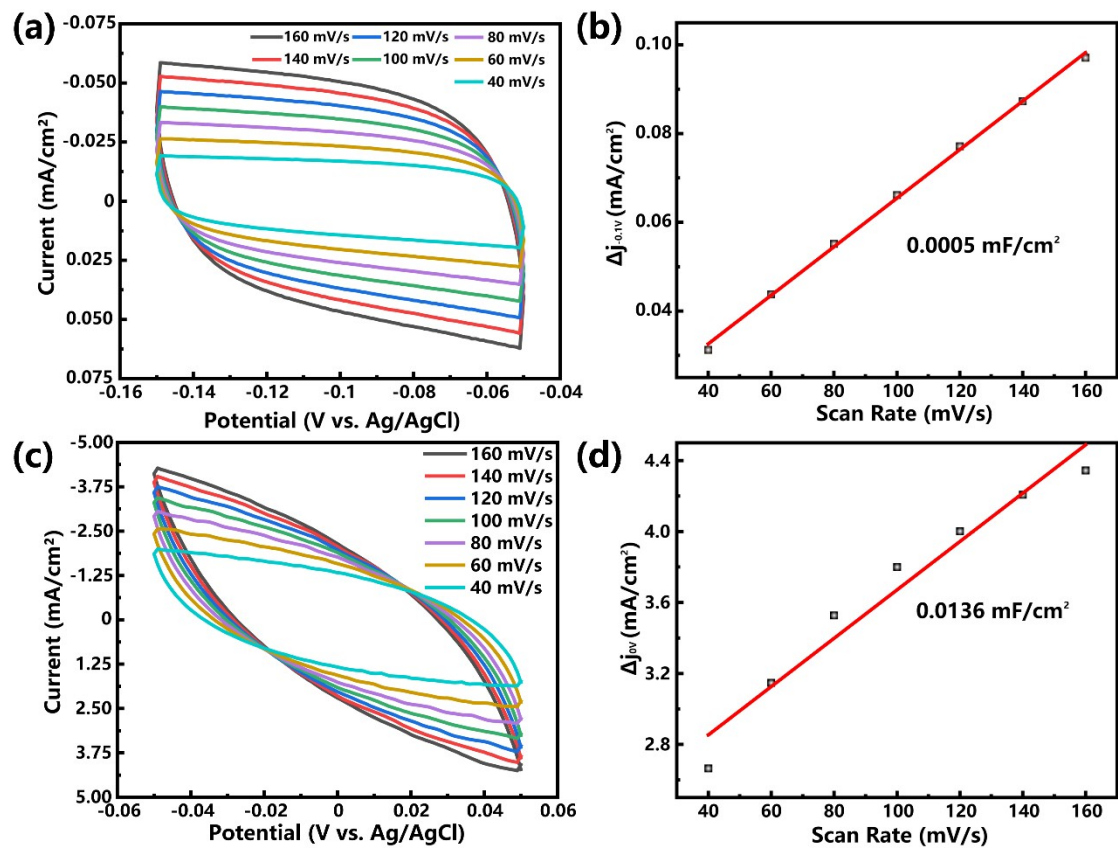

**Figure S7.** Cyclic voltammograms (CV) for (a) Ni-MOF and (c) RuNi-MOF at different scan rates from 20 to 160 mV/s, respectively. Double-layer capacitances ( $C_{dl}$ ) calculated by the differences in current density as a linear function of scan rates of (b) Ni-MOF and (d) RuNi-MOF.

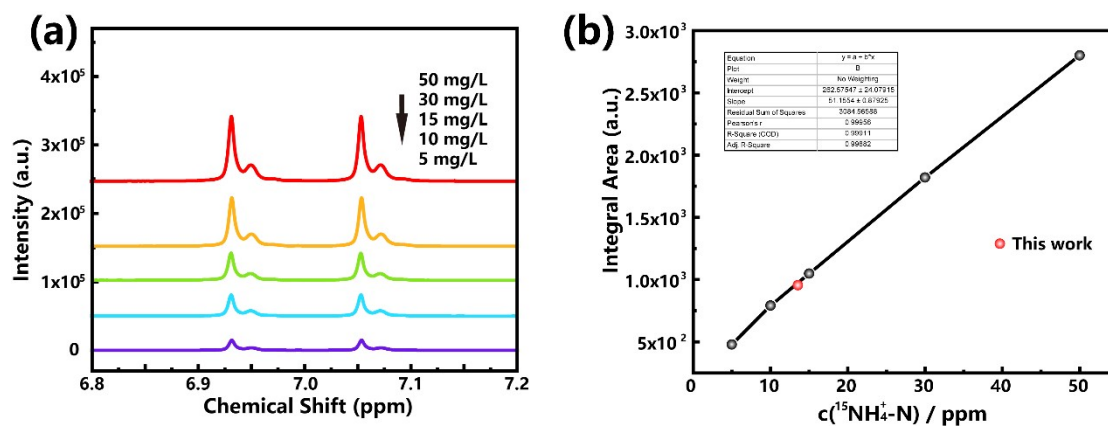

**Figure S8.** (a)  $^1\text{H}$  NMR spectra of  $^{15}\text{NH}_4^+$ - $^{15}\text{N}$  with different concentrations. (b) The standard curve of integral area ( $^{15}\text{NH}_4^+$ - $^{15}\text{N}$ ) against  $^{15}\text{NH}_4^+$ - $^{15}\text{N}$  concentration.

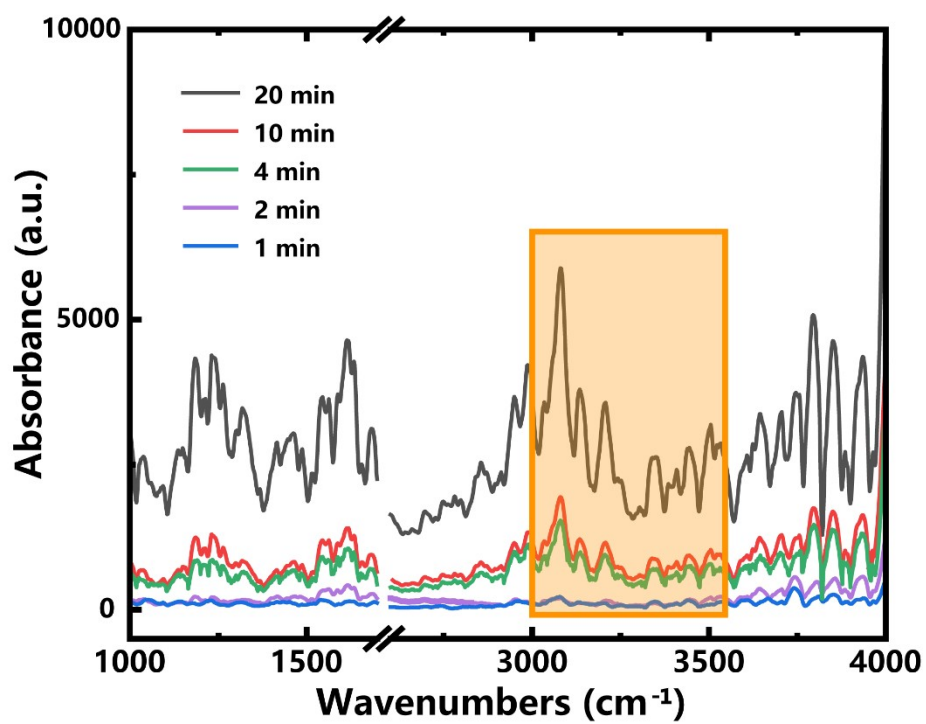

**Figure S9.** FT-IR spectroscopy measurements varying with time for RuNi-MOF.



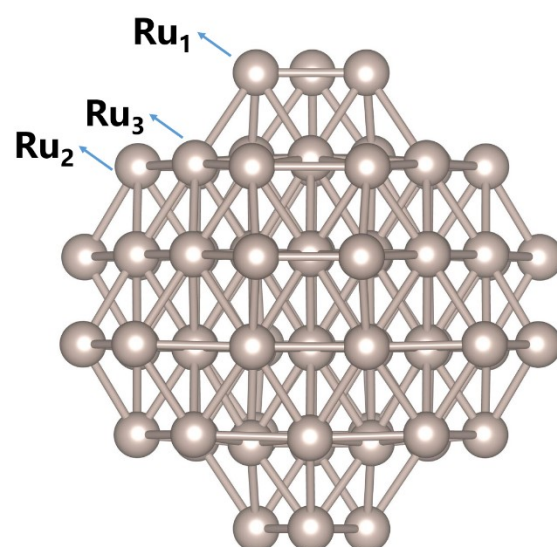

**Figure S10.** Ru nanoparticle displaying three different Ru sites: Five-coordinated Ru<sub>1</sub> site, six-coordinated Ru<sub>2</sub> site and eight-coordinated Ru<sub>3</sub> site.

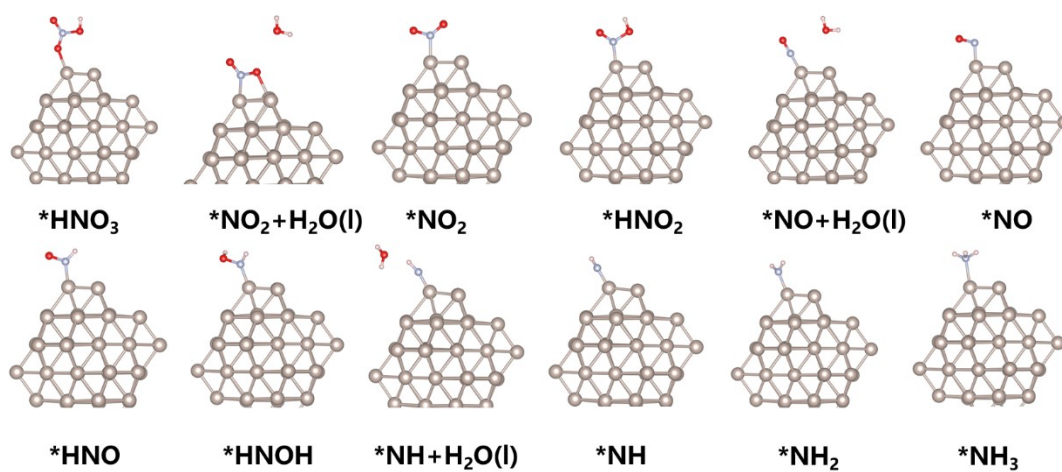

**Figure S11.** The reaction pathways of  $\text{NO}_3^-$  to  $\text{NH}_3$  on  $\text{Ru}_1$  sites.

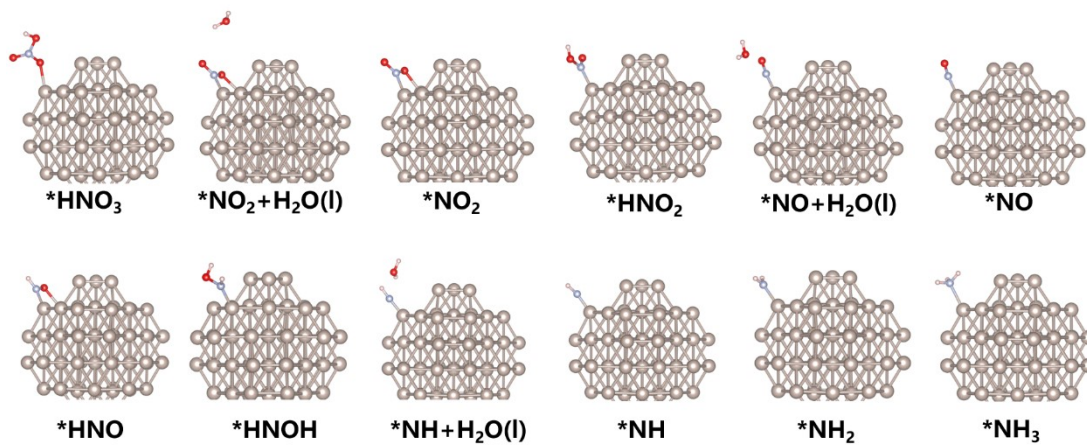

**Figure S12.** The reaction pathways of  $\text{NO}_3^-$  to  $\text{NH}_3$  on  $\text{Ru}_2$  sites.

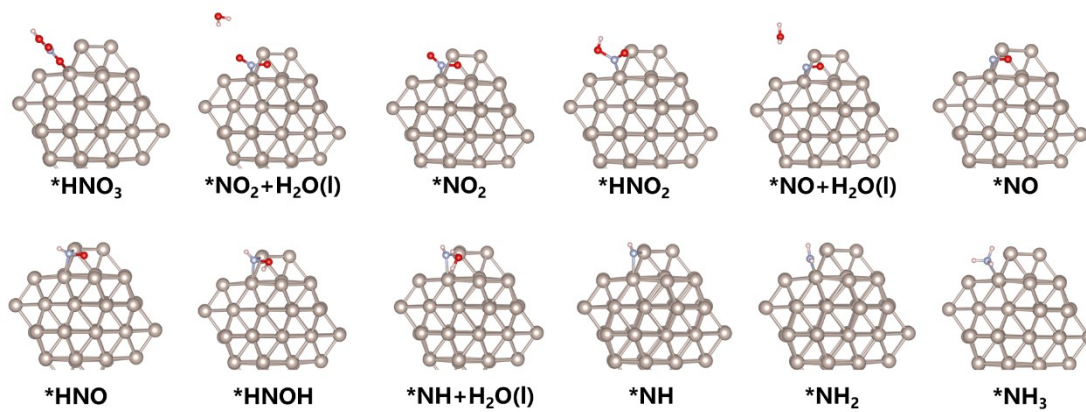

**Figure S13.** The reaction pathways of  $\text{NO}_3^-$  to  $\text{NH}_3$  on  $\text{Ru}_3$  sites.

**Table 1.** Comparison of performance of RuNi-MOF with reported catalysts by electrocatalytic NO<sub>3</sub><sup>-</sup> reduction.

| Catalyst                                               | Electrolyte                                                         | NH <sub>3</sub> partial current | FE (%) | NO <sub>3</sub> <sup>-</sup> -to-NH <sub>3</sub> selectivity (%) | Overpotential         | Reference |
|--------------------------------------------------------|---------------------------------------------------------------------|---------------------------------|--------|------------------------------------------------------------------|-----------------------|-----------|
| RuNi-MOF                                               | 50 ppm NO <sub>3</sub> <sup>-</sup> -N<br>+ 0.1 M NaSO <sub>4</sub> | 31.43 mA cm <sup>-2</sup>       | 55.9   | 100                                                              |                       | This work |
|                                                        | 100 ppm NO <sub>3</sub> <sup>-</sup> -<br>N+0.1 M NaSO <sub>4</sub> | 31.45 mA cm <sup>-2</sup>       | 58.8   | 100                                                              | -1.6 V vs.<br>Ag/AgCl |           |
|                                                        | 200 ppm NO <sub>3</sub> <sup>-</sup> -<br>N+0.1 M NaSO <sub>4</sub> | 30.575 mA<br>cm <sup>-2</sup>   | 63.6%  | 100                                                              |                       |           |
| Fe SAC                                                 | 0.5 M KNO <sub>3</sub> /0.1<br>M KSO <sub>4</sub>                   | 98.6 mA cm <sup>-2</sup>        | 74.9%  | 69                                                               | -0.66 V vs.<br>RHE    | 2         |
| TiO <sub>2-x</sub> /Ti<br>foil                         | 50 ppm NO <sub>3</sub> <sup>-</sup> -<br>N+0.5 M NaSO <sub>4</sub>  | < 10 mA cm <sup>-2</sup>        | 85     | 87.1                                                             | -1.6 V<br>vs SCE      | 3         |
| Cu/Cu <sub>2</sub> O<br>NWAs                           | 200 ppm NO <sub>3</sub> <sup>-</sup> -<br>N+0.5 M NaSO <sub>4</sub> | 100 mA cm <sup>-2</sup>         | 95.8   | 81.2                                                             | -0.85 V vs.<br>RHE    | 4         |
| Ni-Fe <sup>0</sup> @<br>Fe <sub>3</sub> O <sub>4</sub> | 50 ppm NO <sub>3</sub> <sup>-</sup> -<br>+10 mM NaCl                | 5 mA cm <sup>-2</sup>           | -      | 10.4                                                             | -1.4 V                | 5         |
| Cu-<br>incorporated<br>PTCDA                           | 0.1 mM PBS +<br>36 mM NO <sub>3</sub> <sup>-</sup> -                | -11.04 mA<br>cm <sup>-2</sup>   | 85.9   | -                                                                | -0.4 V vs.<br>RHE     | 6         |
| OD-Co                                                  | 1 M KOH                                                             | 565.26 mA<br>cm <sup>-2</sup>   | 92.4   | -                                                                | -0.8 V vs.<br>RHE     | 7         |

|            |                           |   |      |   |             |   |
|------------|---------------------------|---|------|---|-------------|---|
| Pd-Cu/SS   | 0.01 M NaClO <sub>4</sub> | - | -    | 6 | -0.3 V vs.  | 8 |
|            | + 0.6 mM                  |   |      |   | SCE         |   |
|            | NaNO <sub>3</sub>         |   |      |   |             |   |
| Cu         | 0.1 M KOH + 10            | - | 99.7 | - | -0.15 V vs. | 9 |
| nanosheets | mM KNO <sub>3</sub>       |   |      |   | RHE         |   |

---

**Table 2.** All the enthalpy, ZPE, S values used for the mechanism studies.

| *HNO <sub>3</sub>                  | Ru <sub>1</sub>                   | Ru <sub>2</sub>                   | Ru <sub>3</sub>                   |
|------------------------------------|-----------------------------------|-----------------------------------|-----------------------------------|
| Zero-point energy E_ZPE:           | 15.601 kcal/mol<br>0.676508 eV    | 15.550 kcal/mol<br>0.674314 eV    | 15.693 kcal/mol<br>0.680532 eV    |
| Thermal correction to U(T):        | 18.767 kcal/mol<br>0.813825 eV    | 18.333 kcal/mol<br>0.794980 eV    | 18.437 kcal/mol<br>0.799512 eV    |
| Thermal correction to H(T):        | 18.767 kcal/mol<br>0.813825 eV    | 18.333 kcal/mol<br>0.794980 eV    | 18.437 kcal/mol<br>0.799512 eV    |
| Thermal correction to G(T):        | 12.797 kcal/mol<br>0.554932 eV    | 12.883 kcal/mol<br>0.558667 eV    | 12.974 kcal/mol<br>0.562619 eV    |
| Entropy S:                         | 83.781 J/(mol*K)<br>0.000868 eV/K | 76.474 J/(mol*K)<br>0.000793 eV/K | 76.662 J/(mol*K)<br>0.000795 eV/K |
| Electronic free energy:            | -482.63 eV                        | -482.48 eV                        | -482.20 eV                        |
| *NO <sub>2</sub> +H <sub>2</sub> O | Ru <sub>1</sub>                   | Ru <sub>2</sub>                   | Ru <sub>3</sub>                   |
| Zero-point energy E_ZPE:           | 19.317 kcal/mol<br>0.837650 eV    | 19.748 kcal/mol<br>0.856335 eV    | 19.247 kcal/mol<br>0.834621 eV    |
| Thermal correction to U(T):        | 22.076 kcal/mol<br>0.957309 eV    | 23.237 kcal/mol<br>1.007674 eV    | 21.963 kcal/mol<br>0.952396 eV    |
| Thermal correction to H(T):        | 22.076 kcal/mol<br>0.957309 eV    | 23.237 kcal/mol<br>1.007674 eV    | 21.963 kcal/mol<br>0.952396 eV    |
| Thermal correction to G(T):        | 16.943 kcal/mol<br>0.734721 eV    | 16.614 kcal/mol<br>0.720454 eV    | 17.086 kcal/mol<br>0.740930 eV    |
| Entropy S:                         | 72.032 J/(mol*K)<br>0.000747 eV/K | 92.948 J/(mol*K)<br>0.000963 eV/K | 68.433 J/(mol*K)<br>0.000709 eV/K |
| Electronic free energy:            | -488.69 eV                        | -488.96 eV                        | -488.83 eV                        |
| *NO <sub>2</sub>                   | Ru <sub>1</sub>                   | Ru <sub>2</sub>                   | Ru <sub>3</sub>                   |
| Zero-point energy E_ZPE:           | 6.304 kcal/mol<br>0.273354 eV     | 5.582 kcal/mol<br>0.242052 eV     | 5.890 kcal/mol<br>0.255407 eV     |
| Thermal correction to U(T):        | 8.164 kcal/mol<br>0.354007 eV     | 6.514 kcal/mol<br>0.282493 eV     | 8.225 kcal/mol<br>0.356659 eV     |
| Thermal correction to H(T):        | 8.164 kcal/mol<br>0.354007 eV     | 6.514 kcal/mol<br>0.282493 eV     | 8.225 kcal/mol<br>0.356659 eV     |
| Thermal correction to G(T):        | 4.594 kcal/mol<br>0.199222 eV     | 5.024 kcal/mol<br>0.217865 eV     | 3.332 kcal/mol<br>0.144496 eV     |
| Entropy S:                         | 50.090 J/(mol*K)<br>0.000519 eV/K | 20.914 J/(mol*K)<br>0.000217 eV/K | 68.659 J/(mol*K)<br>0.000712 eV/K |
| Electronic free energy:            | -474.56 eV                        | -474.95 eV                        | -474.76 eV                        |
| *HNO <sub>2</sub>                  | Ru <sub>1</sub>                   | Ru <sub>2</sub>                   | Ru <sub>3</sub>                   |
| Zero-point energy E_ZPE:           | 12.485 kcal/mol<br>0.541380 eV    | 12.469 kcal/mol<br>0.540713 eV    | 12.423 kcal/mol<br>0.538726 eV    |
| Thermal correction to U(T):        | 14.585 kcal/mol<br>0.632449 eV    | 14.131 kcal/mol<br>0.612787 eV    | 14.565 kcal/mol<br>0.631591 eV    |
| Thermal correction to H(T):        | 14.585 kcal/mol<br>0.632449 eV    | 14.131 kcal/mol<br>0.612787 eV    | 14.565 kcal/mol<br>0.631591 eV    |

|                             |                                   |                                    |                                   |
|-----------------------------|-----------------------------------|------------------------------------|-----------------------------------|
| Thermal correction to G(T): | 10.869 kcal/mol<br>0.471342 eV    | 11.135 kcal/mol<br>0.482855 eV     | 10.348 kcal/mol<br>0.448748 eV    |
| Entropy S:                  | 52.136 J/(mol*K)<br>0.000540 eV/K | 42.048 J/(mol*K)<br>0.000436 eV/K  | 59.170 J/(mol*K)<br>0.000613 eV/K |
| Electronic free energy:     | -478.02 eV                        | -478.22 eV                         | -477.85 eV                        |
| <b>*NO+H<sub>2</sub>O</b>   | <b>Ru<sub>1</sub></b>             | <b>Ru<sub>2</sub></b>              | <b>Ru<sub>3</sub></b>             |
| Zero-point energy E_ZPE:    | 17.498 kcal/mol<br>0.758790 eV    | 17.938 kcal/mol<br>0.777868 eV     | 17.014 kcal/mol<br>0.737804 eV    |
| Thermal correction to U(T): | 20.583 kcal/mol<br>0.892554 eV    | 21.808 kcal/mol<br>0.945698 eV     | 20.007 kcal/mol<br>0.867593 eV    |
| Thermal correction to H(T): | 20.583 kcal/mol<br>0.892554 eV    | 21.808 kcal/mol<br>0.945698 eV     | 20.007 kcal/mol<br>0.867593 eV    |
| Thermal correction to G(T): | 14.578 kcal/mol<br>0.632178 eV    | 14.127 kcal/mol<br>0.612613 eV     | 13.774 kcal/mol<br>0.597288 eV    |
| Entropy S:                  | 84.261 J/(mol*K)<br>0.000873 eV/K | 107.791 J/(mol*K)<br>0.001117 eV/K | 87.474 J/(mol*K)<br>0.000907 eV/K |
| Electronic free energy:     | -483.57 eV                        | -483.40 eV                         | -483.32 eV                        |
| <b>*NO</b>                  | <b>Ru<sub>1</sub></b>             | <b>Ru<sub>2</sub></b>              | <b>Ru<sub>3</sub></b>             |
| Zero-point energy E_ZPE:    | 3.287 kcal/mol<br>0.142558 eV     | 4.311 kcal/mol<br>0.186959 eV      | 4.002 kcal/mol<br>0.173533 eV     |
| Thermal correction to U(T): | 4.722 kcal/mol<br>0.204747 eV     | 5.789 kcal/mol<br>0.251052 eV      | 5.279 kcal/mol<br>0.228916 eV     |
| Thermal correction to H(T): | 4.722 kcal/mol<br>0.204747 eV     | 5.789 kcal/mol<br>0.251052 eV      | 5.279 kcal/mol<br>0.228916 eV     |
| Thermal correction to G(T): | 1.812 kcal/mol<br>0.078558 eV     | 3.052 kcal/mol<br>0.132340 eV      | 3.101 kcal/mol<br>0.134469 eV     |
| Entropy S:                  | 40.836 J/(mol*K)<br>0.000423 eV/K | 38.417 J/(mol*K)<br>0.000398 eV/K  | 30.564 J/(mol*K)<br>0.000317 eV/K |
| Electronic free energy:     | -468.75 eV                        | -469.62 eV                         | -469.45 eV                        |
| <b>*HNO</b>                 | <b>Ru<sub>1</sub></b>             | <b>Ru<sub>2</sub></b>              | <b>Ru<sub>3</sub></b>             |
| Zero-point energy E_ZPE:    | 10.399 kcal/mol<br>0.450941 eV    | 10.662 kcal/mol<br>0.462347 eV     | 11.104 kcal/mol<br>0.481510 eV    |
| Thermal correction to U(T): | 12.337 kcal/mol<br>0.534991 eV    | 12.255 kcal/mol<br>0.531407 eV     | 12.385 kcal/mol<br>0.537055 eV    |
| Thermal correction to H(T): | 12.337 kcal/mol<br>0.534991 eV    | 12.255 kcal/mol<br>0.531407 eV     | 12.385 kcal/mol<br>0.537055 eV    |
| Thermal correction to G(T): | 8.523 kcal/mol<br>0.369605 eV     | 9.498 kcal/mol<br>0.411864 eV      | 10.342 kcal/mol<br>0.448485 eV    |
| Entropy S:                  | 53.521 J/(mol*K)<br>0.000555 eV/K | 38.686 J/(mol*K)<br>0.000401 eV/K  | 28.662 J/(mol*K)<br>0.000297 eV/K |
| Electronic free energy:     | -472.33 eV                        | -473.24 eV                         | -473.27 eV                        |
| <b>*HNOH</b>                | <b>Ru<sub>1</sub></b>             | <b>Ru<sub>2</sub></b>              | <b>Ru<sub>3</sub></b>             |
| Zero-point energy E_ZPE:    | 16.120 kcal/mol<br>0.699022 eV    | 17.055 kcal/mol<br>0.739575 eV     | 15.647 kcal/mol<br>0.678499 eV    |



|                             |                                   |                                   |                                   |
|-----------------------------|-----------------------------------|-----------------------------------|-----------------------------------|
| Thermal correction to U(T): | 17.846 kcal/mol<br>0.773863 eV    | 19.198 kcal/mol<br>0.832486 eV    | 17.621 kcal/mol<br>0.764108 eV    |
| Thermal correction to H(T): | 17.846 kcal/mol<br>0.773863 eV    | 19.198 kcal/mol<br>0.832486 eV    | 17.621 kcal/mol<br>0.764108 eV    |
| Thermal correction to G(T): | 14.475 kcal/mol<br>0.627696 eV    | 15.363 kcal/mol<br>0.666206 eV    | 13.861 kcal/mol<br>0.601088 eV    |
| Entropy S:                  | 47.302 J/(mol*K)<br>0.000490 eV/K | 53.810 J/(mol*K)<br>0.000558 eV/K | 52.755 J/(mol*K)<br>0.000547 eV/K |
| Electronic free energy:     | -476.07 eV                        | -476.13 eV                        | -476.24 eV                        |
| <b>*NH+H<sub>2</sub>O</b>   | <b>Ru<sub>1</sub></b>             | <b>Ru<sub>2</sub></b>             | <b>Ru<sub>3</sub></b>             |
| Zero-point energy E_ZPE:    | 21.322 kcal/mol<br>0.924620 eV    | 20.175 kcal/mol<br>0.874883 eV    | 21.201 kcal/mol<br>0.919350 eV    |
| Thermal correction to U(T): | 24.078 kcal/mol<br>1.044118 eV    | 22.686 kcal/mol<br>0.983768 eV    | 24.192 kcal/mol<br>1.049060 eV    |
| Thermal correction to H(T): | 24.078 kcal/mol<br>1.044118 eV    | 22.686 kcal/mol<br>0.983768 eV    | 24.192 kcal/mol<br>1.049060 eV    |
| Thermal correction to G(T): | 18.767 kcal/mol<br>0.813821 eV    | 17.943 kcal/mol<br>0.778093 eV    | 18.239 kcal/mol<br>0.790913 eV    |
| Entropy S:                  | 74.527 J/(mol*K)<br>0.000772 eV/K | 66.559 J/(mol*K)<br>0.000690 eV/K | 83.540 J/(mol*K)<br>0.000866 eV/K |
| Electronic free energy:     | -481.14 eV                        | -480.96 eV                        | -481.71 eV                        |
| <b>*NH</b>                  | <b>Ru<sub>1</sub></b>             | <b>Ru<sub>2</sub></b>             | <b>Ru<sub>3</sub></b>             |
| Zero-point energy E_ZPE:    | 7.264 kcal/mol<br>0.314992 eV     | 7.123 kcal/mol<br>0.308863 eV     | 7.615 kcal/mol<br>0.330201 eV     |
| Thermal correction to U(T): | 8.520 kcal/mol<br>0.369457 eV     | 8.500 kcal/mol<br>0.368587 eV     | 8.739 kcal/mol<br>0.378938 eV     |
| Thermal correction to H(T): | 8.520 kcal/mol<br>0.369457 eV     | 8.500 kcal/mol<br>0.368587 eV     | 8.739 kcal/mol<br>0.378938 eV     |
| Thermal correction to G(T): | 6.285 kcal/mol<br>0.272522 eV     | 5.983 kcal/mol<br>0.259453 eV     | 6.851 kcal/mol<br>0.297066 eV     |
| Entropy S:                  | 31.369 J/(mol*K)<br>0.000325 eV/K | 35.317 J/(mol*K)<br>0.000366 eV/K | 26.495 J/(mol*K)<br>0.000275 eV/K |
| Electronic free energy:     | -467.30 eV                        | -467.15 eV                        | -467.61 eV                        |
| <b>*NH<sub>2</sub></b>      | <b>Ru<sub>1</sub></b>             | <b>Ru<sub>2</sub></b>             | <b>Ru<sub>3</sub></b>             |
| Zero-point energy E_ZPE:    | 14.421 kcal/mol<br>0.625335 eV    | 14.703 kcal/mol<br>0.637566 eV    | 14.414 kcal/mol<br>0.625037 eV    |
| Thermal correction to U(T): | 16.075 kcal/mol<br>0.697092 eV    | 16.189 kcal/mol<br>0.702026 eV    | 16.093 kcal/mol<br>0.697842 eV    |
| Thermal correction to H(T): | 16.075 kcal/mol<br>0.697092 eV    | 16.189 kcal/mol<br>0.702026 eV    | 16.093 kcal/mol<br>0.697842 eV    |
| Thermal correction to G(T): | 12.967 kcal/mol<br>0.562285 eV    | 13.518 kcal/mol<br>0.586216 eV    | 12.880 kcal/mol<br>0.558518 eV    |
| Entropy S:                  | 43.625 J/(mol*K)<br>0.000452 eV/K | 37.478 J/(mol*K)<br>0.000388 eV/K | 45.087 J/(mol*K)<br>0.000467 eV/K |

|                             |                  |                  |                  |
|-----------------------------|------------------|------------------|------------------|
| Electronic free energy:     | -471.48 eV       | -471.43 eV       | -470.83 eV       |
| *NH <sub>3</sub>            | Ru <sub>1</sub>  | Ru <sub>2</sub>  | Ru <sub>3</sub>  |
| Zero-point energy E_ZPE:    | 22.920 kcal/mol  | 23.053 kcal/mol  | 22.976 kcal/mol  |
|                             | 0.993899 eV      | 0.999693 eV      | 0.996333 eV      |
| Thermal correction to U(T): | 24.721 kcal/mol  | 24.818 kcal/mol  | 24.694 kcal/mol  |
|                             | 1.072001 eV      | 1.076189 eV      | 1.070849 eV      |
| Thermal correction to H(T): | 24.721 kcal/mol  | 24.818 kcal/mol  | 24.694 kcal/mol  |
|                             | 1.072001 eV      | 1.076189 eV      | 1.070849 eV      |
| Thermal correction to G(T): | 21.125 kcal/mol  | 21.520 kcal/mol  | 21.592 kcal/mol  |
|                             | 0.916059 eV      | 0.933212 eV      | 0.936316 eV      |
| Entropy S:                  | 50.465 J/(mol*K) | 46.269 J/(mol*K) | 43.537 J/(mol*K) |
|                             | 0.000523 eV/K    | 0.000480 eV/K    | 0.000451 eV/K    |
| Electronic free energy:     | -475.30 eV       | -475.32 eV       | -475.02 eV       |

## Supplementary references

1. Nørskov J. K. et al. Origin of the overpotential for oxygen reduction at a fuel-cell cathode. *J Phys Chem B* 2004, 108, 17886-17892.
2. Wu, Z. et al. Electrochemical ammonia synthesis via nitrate reduction on Fe single atom catalyst. *Nat. Commun.* 2021, 12, 2870.
3. Jia, R. et al. Boosting selective nitrate electroreduction to ammonium by constructing oxygen vacancies in TiO<sub>2</sub>. *ACS Catal.* 2020, 10, 3533-3540.
4. Wang, Y. et al. Unveiling the activity origin of a copper-based electrocatalyst for selective nitrate reduction to ammonia. *Angew. Chem. Int. Ed.* 2020, 59, 5350-5354.
5. Yin, D. et al. In situ growth of copper/reduced graphene oxide on graphite surfaces for the electrocatalytic reduction of nitrate. *Electrochim. Acta* 2019, 324, 134846.
6. Chen, G.-F. et al. Electrochemical reduction of nitrate to ammonia via direct eight-electron transfer using a copper-molecular solid catalyst. *Nat. Energy* 2020, 5, 605-613.
7. Kani, N. C. et al. Solar-driven electrochemical synthesis of ammonia using nitrate with 11% solar-to-fuel efficiency at ambient conditions. *Energy & Environ. Sci.* 2021. DOI: 10.1039/d1ee01879e.
8. Su, J. F. et al. The electrochemical reduction of nitrate over micro-architected metal electrodes with stainless steel scaffold. *Appl. Catal., B* 2016, 180, 199-209.
9. Fu, X. et al. Alternative route for electrochemical ammonia synthesis by reduction of nitrate on copper nanosheets. *Appl. Mater. Today* 2020, 19, 100620.
